# Supplementary material
Source: PubMed Central journal article supplement (PMC7855476)
Supplement: NIHMS1656914-supplement-Supplemental_material.pdf [file NIHMS1656914-supplement-Supplemental_material.pdf]

# Supplementary Materials

## 1 Additional Figures

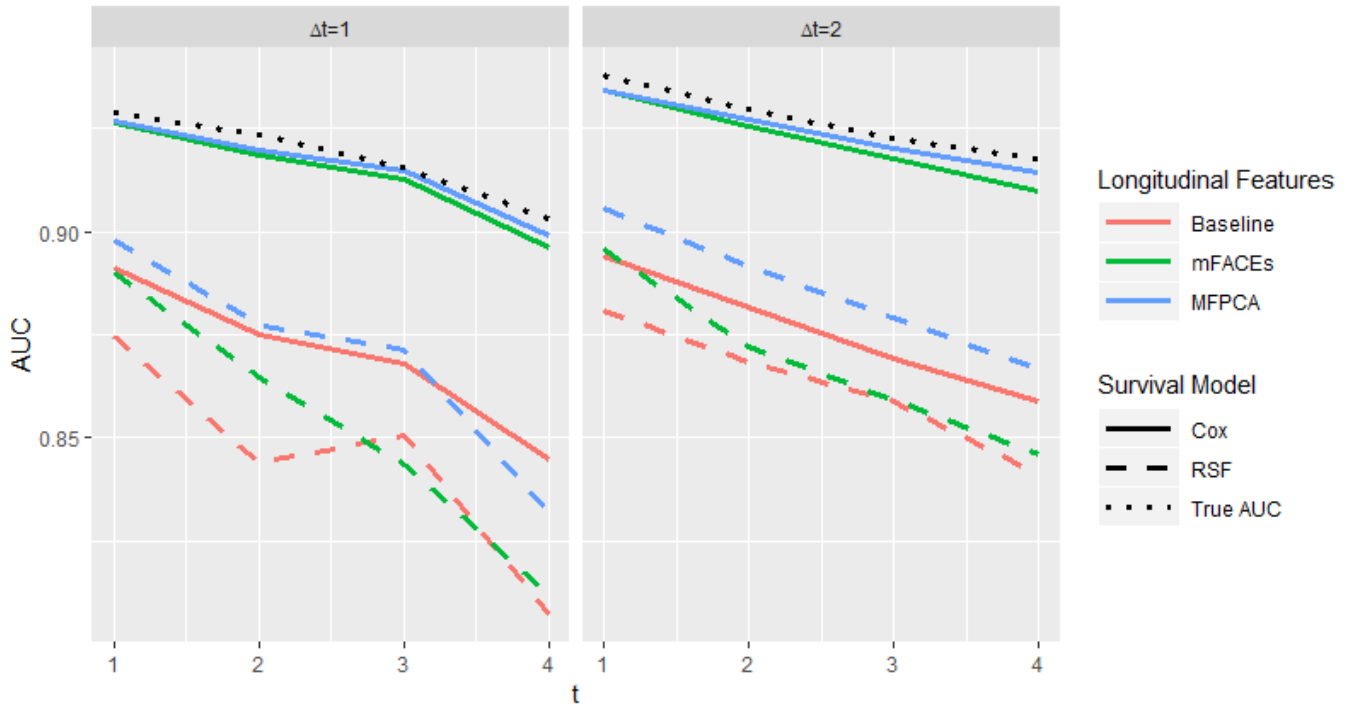

Figure S1: Comparison of AUC's from Scenario 1. Each model is composed of the method used to extract features of the longitudinal data (represented by color) and the survival model (represented by linetype). Baseline models exclude the longitudinal data.

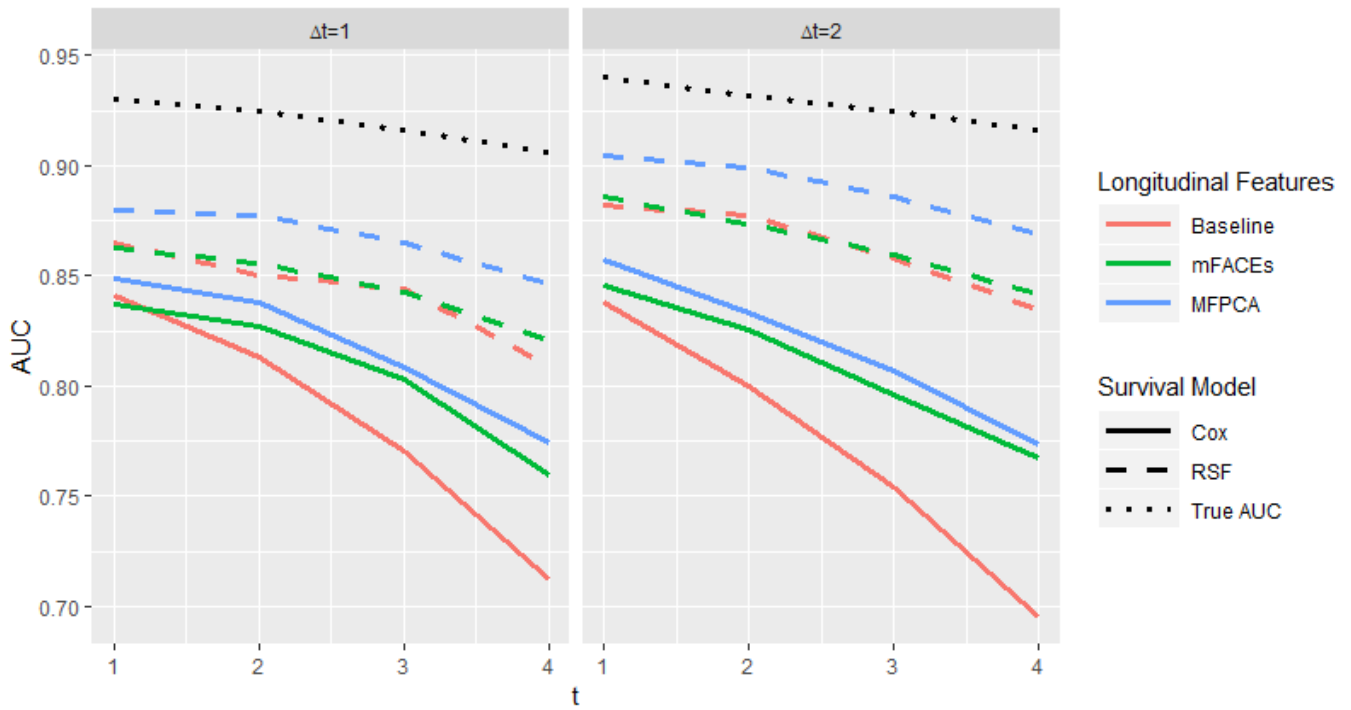

Figure S2: Comparison of AUC's from Scenario 2. Each model is composed of the method used to extract features of the longitudinal data (represented by color) and the survival model (represented by linetype). Baseline models exclude the longitudinal data.

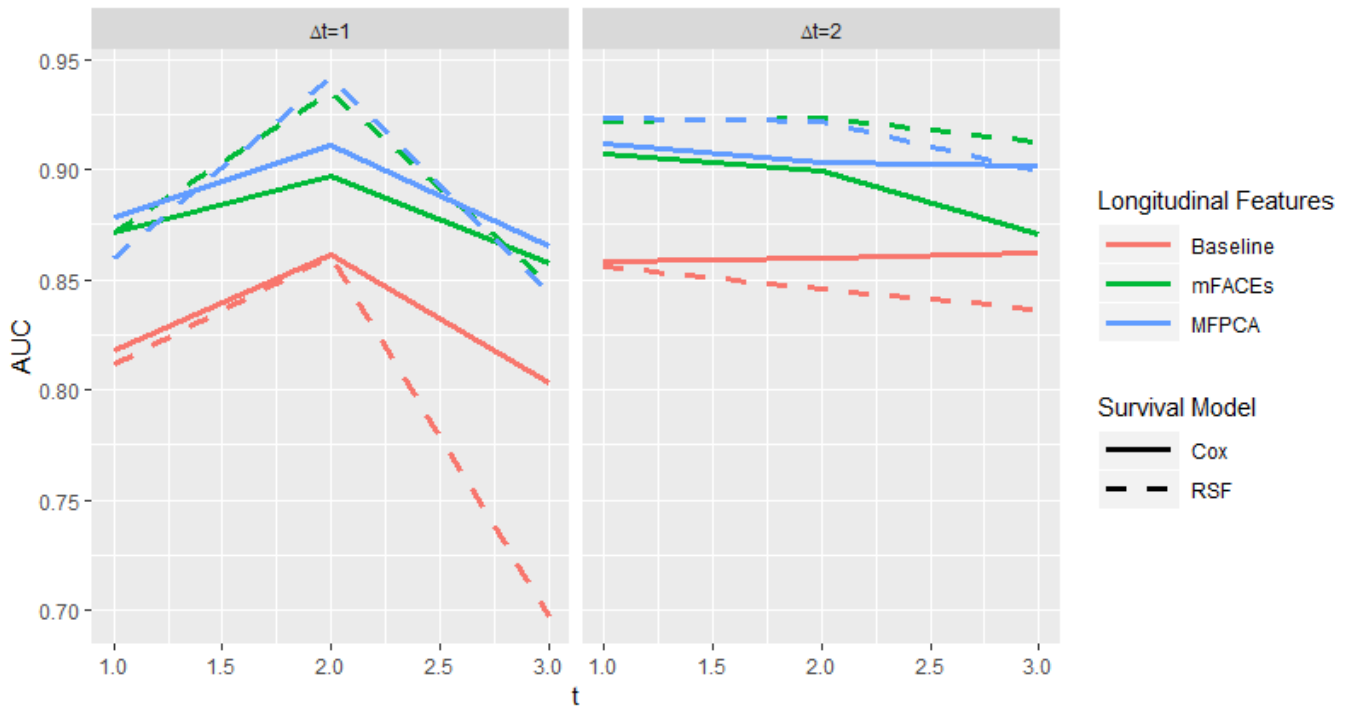

Figure S3: Comparison of AUC's from models of the ADNI study. Each model is composed of the method used to extract features of the longitudinal data (represented by color) and the survival model (represented by linetype). Baseline models exclude the longitudinal data.

Global Schoenfeld Test p: 0.2979

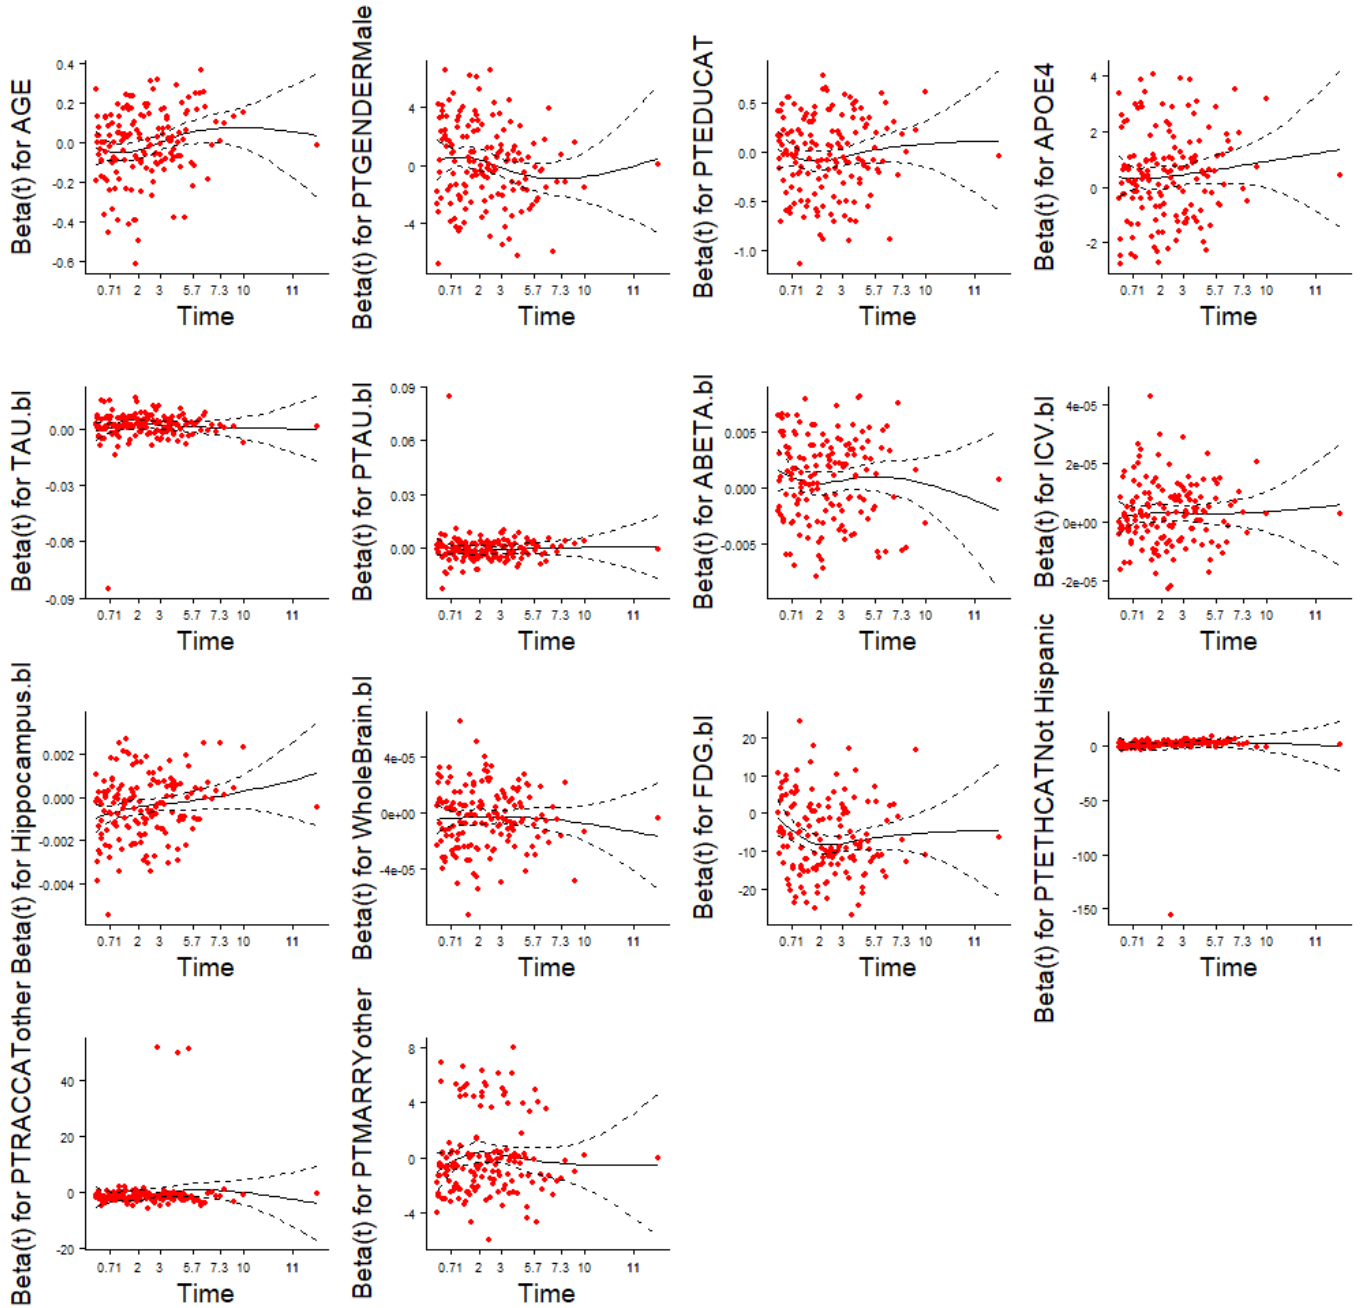

Figure S4: Scaled Schoenfeld residuals plotted against transformed time for each baseline covariate.

## 2 Simulation study with sparse data setting

We repeated the simulation for Scenario 1 with 30% of the longitudinal measurements randomly deleted. The AUC and Brier score are presented in Table S1 of the supplement. In these results, we do not observe a significant difference in the AUC and Brier scores between the MFPCA and mFACES methods. Therefore, we cannot confirm that mFACES performs better when the data is sparse in our simulation setting.

| t             | $\Delta t$ | True AUC | RSF   |       | Cox   |       |
|---------------|------------|----------|-------|-------|-------|-------|
|               |            |          | AUC   | BS    | AUC   | BS    |
| <b>MFPCA</b>  |            |          |       |       |       |       |
| 1             | 1          | 0.929    | 0.898 | 0.055 | 0.927 | 0.044 |
| 1             | 2          | 0.938    | 0.904 | 0.089 | 0.934 | 0.067 |
| 2             | 1          | 0.924    | 0.875 | 0.062 | 0.918 | 0.051 |
| 2             | 2          | 0.930    | 0.889 | 0.103 | 0.927 | 0.078 |
| 3             | 1          | 0.915    | 0.867 | 0.073 | 0.915 | 0.059 |
| 3             | 2          | 0.923    | 0.874 | 0.123 | 0.919 | 0.091 |
| 4             | 1          | 0.903    | 0.828 | 0.088 | 0.897 | 0.071 |
| 4             | 2          | 0.918    | 0.859 | 0.144 | 0.912 | 0.107 |
| <b>mFACES</b> |            |          |       |       |       |       |
| 1             | 1          | 0.929    | 0.894 | 0.055 | 0.927 | 0.044 |
| 1             | 2          | 0.938    | 0.900 | 0.091 | 0.934 | 0.067 |
| 2             | 1          | 0.924    | 0.867 | 0.063 | 0.919 | 0.051 |
| 2             | 2          | 0.930    | 0.882 | 0.106 | 0.926 | 0.079 |
| 3             | 1          | 0.915    | 0.858 | 0.074 | 0.913 | 0.060 |
| 3             | 2          | 0.923    | 0.870 | 0.126 | 0.917 | 0.093 |
| 4             | 1          | 0.903    | 0.824 | 0.089 | 0.896 | 0.073 |
| 4             | 2          | 0.918    | 0.853 | 0.149 | 0.910 | 0.109 |

Table S1: Sparse simulation setting: AUC and BS are averaged across 100 simulated datasets with 30% of visits removed.

## 3 Code

### 3.1 MFPCA code for simulation study

```
library(MASS)
library(MFPCA)
library(randomForestSRC)
library(pec)
library(survival)
source('functions.r')

n.sim = 100      #number of simulation runs
n = 300         #sample size
n.train = 200   #n.test = n - n.train

#dynamic prediction information
obstime = seq(0,10,0.5) # longitudinal measurement time
Tstart = c(1,2,3,4) # landmark time for prediction
deltaT = c(1,2) # prediction windows
argvals = obstime

scenario = "none" #options: ["none","interaction"]

for(i.run in 1:n.sim){
  print(i.run)
  set.seed(123+i.run)

  ### Simulation ###
  sim.data = sim_mjm_linear(n, obstime=obstime, opt=scenario)
  long = sim.data$long # longitudinal data
  surv = sim.data$surv # survival data

  # split data to training and testing
  train.id = c(1:n.train)
  test.id = c((n.train+1):n)

  train.surv = surv[surv$id%in%c(1:n.train), ]
  test.surv = surv[!surv$id%in%c(1:n.train), ]

  # subject ids
  patID = surv$id
  nPat = length(patID)

  # transfer longitudinal outcomes from long to wide
  multivar = array(NA, c(n, length(obstime), 3))
```

```

for(i in 1:nPat){
  visits = which(obstime %in% (long$id == patID[i]))
  multivar[i, visits, 1] = long$Y1[long$id == patID[i]]
  multivar[i, visits, 2] = long$Y2[long$id == patID[i]]
  multivar[i, visits, 3] = long$Y3[long$id == patID[i]]
}
multivar.train = multivar[train.id, , ]

# univariate FPCA via PACE
Xi.train = L = phi.train = meanFun.train = NULL
x.tmp = NULL
for(p in 1:3){
  tmp.ufpca = uPACE(multivar.train[, , p], argvals, nbasis=7)
  x.tmp = cbind(x.tmp, tmp.ufpca$scores[, 1])
  Xi.train = cbind(Xi.train, tmp.ufpca$scores) # FPC scores
  L = c(L, dim(tmp.ufpca$scores)[2])
  phi.train[[p]] = t(tmp.ufpca$functions@X) # FPC eigenfunctions
  meanFun.train[[p]] = tmp.ufpca$mu@X # estimated mean functions
}

# multivariate FPCA
mFPCA.train = mFPCA(Xi=Xi.train, phi=phi.train, p=3, L=L, I=n.train)
rho.train = mFPCA.train$rho # MFPC scores
pve = mFPCA.train$pve
psi = mFPCA.train$psi
Cms = mFPCA.train$Cms

colnames(rho.train) = paste0("rho.", (1:ncol(rho.train)))
train.surv.temp = cbind(train.surv[, 2:5], rho.train)

#RSF Model
rsf.fit = rfsrc(Surv(time, event)~., data=train.surv.temp,
               ntree=1000, seed=i.run)

#Cox Model
cox.fit = coxph(Surv(time, event)~., data = train.surv.temp, model=T, x=T, y=T)

# dynamic prediction
DP.id = DP.prob.rsf = DP.prob.cox = DP.prob.truecox = timeEvent= trueProb = NULL
ith = 0
for(t in Tstart){
  tmp.id = test.surv[test.surv$time>t, "id"]
  tmp.surv.data = test.surv[test.surv$time>t, ] # filter the data
  tmp.data = multivar[tmp.id, , ] # subset longitudinal outcomes
  tmp.data[, -c(1:which(t==obstime)), ] = NA
}

```

```

# univariate FPC
Xi.test = NULL
for(p in 1:3){
  tmp.ufpca = uPACE(multivar.train[, ,p], argvals, tmp.data[, ,p], nbasis = 7)
  Xi.test = cbind(Xi.test, tmp.ufpca$scores)
}

# estimate MFPC scores for test subjects
rho.test = mfpca.score(Xi.test, Cms)
colnames(rho.test) = paste0("rho.", (1:ncol(rho.test)))
test.surv.temp = cbind(tmp.surv.data[, 2:5], rho.test)

# prediction for different time windowes
for(dt in deltaT){
  ith = ith + 1
  DP.id [[ ith ]] = tmp.id
  timeEvent [[ ith ]] = tmp.surv.data[, c("time", "event")]
  trueProb [[ ith ]] = tmp.surv.data$true.prob[, (which((t+dt)==obstime)-1)]
  DP.prob.rsf [[ ith ]] = cond.prob.pec(rsf.fit, test.surv.temp, t, (t+dt))
  DP.prob.cox [[ ith ]] = cond.prob.pec(cox.fit, test.surv.temp, t, (t+dt))
}
}
DP.prob = DP.prob.rsf
save(sim.data, surv, train.id, trueProb, DP.id, DP.prob, timeEvent,
     file=paste(c("output/mfpca/", scenario, "/mfpca_rsf", i.run, ".rdata"), collapse=""))

DP.prob = DP.prob.cox
save(sim.data, surv, train.id, trueProb, DP.id, DP.prob, timeEvent,
     file=paste(c("output/mfpca/", scenario, "/mfpca_cox", i.run, ".rdata"), collapse=""))
}

```

### 3.2 mFACEs code for simulation study

```

library(MASS)
library(mfaces)
library(randomForestSRC)
library(pec)
library(survival)
source('functions.r')

n.sim = 100      #number of simulation runs
n = 300         #sample size
n.train = 200   #n.test = n - n.train

#dynamic prediction information

```



```

obstime = seq(0,10,0.5) # longitudinal measurement time
Tstart = c(1,2,3,4) # landmark time for prediction
deltaT = c(1,2) # prediction windows
argvals = seq(0,max(obstime),length=10*max(obstime)+1)

scenario = "none" #options: ["none","interaction"]

for(i.run in 1:n.sim){
  print(i.run)
  set.seed(123+i.run)

  ### Simulation ###
  sim.data = sim_mjm_linear(n, obstime=obstime, opt=scenario)
  long = sim.data$long
  surv = sim.data$surv

  ###split data to training and testing
  train.id = c(1:n.train)
  test.id = c((n.train+1):n)

  train.surv = surv[surv$id%in%train.id, ]
  test.surv = surv[surv$id%in%test.id, ]
  train.long = long[long$id%in%train.id, ]
  test.long = long[long$id%in%test.id, ]

  y1 = data.frame("subj"=train.long$id, "argvals"=train.long$obstime, "y"=train.long$Y1)
  y2 = data.frame("subj"=train.long$id, "argvals"=train.long$obstime, "y"=train.long$Y2)
  y3 = data.frame("subj"=train.long$id, "argvals"=train.long$obstime, "y"=train.long$Y3)

  y1 = y1[which(!is.na(y1$y)),]
  y2 = y2[which(!is.na(y2$y)),]
  y3 = y3[which(!is.na(y3$y)),]

  multivar.train = list(y1,y2,y3)

  ### mFACES
  mfaces.fit = mface.sparse(multivar.train, argvals.new = argvals, knots=7,
                           newdata = multivar.train, calculate.scores = TRUE)

  train.surv.tmp = cbind(train.surv[,2:5], mfaces.fit$scores$scores)

  ### Random Survival Forest
  rsf.fit = rfsrc(Surv(time, event)~., data=train.surv.tmp,

```

```

        ntree=1000, seed=i.run)

#### Cox Model
cox.fit = coxph(Surv(time, event)~., data=train.surv.tmp, model=TRUE, x=TRUE, y=TRUE)

#dynamic prediction
DP.id = DP.prob = DP.prob.rsf = DP.prob.cox = timeEvent = trueProb = NULL
ith = 0
for(t in Tstart){
  tmp.surv.data = test.surv[test.surv$time>t, ]
  tmp.id = tmp.surv.data[["id"]]
  test.long = test.long[which(test.long$id %in% tmp.id),]
  test.long = test.long[which(test.long$obstime<=t),]

  y1 = data.frame("subj"=test.long$id, "argvals"=test.long$obstime, "y"=test.long$Y1)
  y2 = data.frame("subj"=test.long$id, "argvals"=test.long$obstime, "y"=test.long$Y2)
  y3 = data.frame("subj"=test.long$id, "argvals"=test.long$obstime, "y"=test.long$Y3)

  y1 = y1[which(!is.na(y1$y)),]
  y2 = y2[which(!is.na(y2$y)),]
  y3 = y3[which(!is.na(y3$y)),]

  multivar.test = list("y1"=y1, "y2"=y2, "y3"=y3)

  mfaces.pred = predict(mfaces.fit, multivar.test, scores=TRUE)

  test.surv.tmp = cbind(tmp.surv.data[,2:5], mfaces.pred$scores$scores)

# prediction for different time windowes
for(dt in deltaT){
  ith = ith + 1
  DP.id[[ith]] = tmp.id
  timeEvent[[ith]] = tmp.surv.data[, c("time", "event")]
  trueProb[[ith]] = tmp.surv.data$true.prob[, (which((t+dt)==obstime)-1)]
  DP.prob.rsf[[ith]] = cond.prob.pec(rsf.fit, test.surv.tmp, t, (t+dt))
  DP.prob.cox[[ith]] = cond.prob.pec(cox.fit, test.surv.tmp, t, (t+dt))
}
}
DP.prob = DP.prob.rsf
save(sim.data, surv, train.id, trueProb, DP.id, DP.prob, timeEvent,
     file=paste(c("output/mfaces/", scenario, "/mfaces_rsf", i.run, ".rdata"), collapse=""))

DP.prob = DP.prob.cox
save(sim.data, surv, train.id, trueProb, DP.id, DP.prob, timeEvent,
     file=paste(c("output/mfaces/", scenario, "/mfaces_cox", i.run, ".rdata"), collapse=""))

```

```
}
```

### 3.3 Calculation of AUC and Brier score

```
library(survival)
library(abind)
source('functions.R')

method = "mfpca"
scenario = "none"
path = paste0("output/", method, "/", scenario, "/")

n.sim = 100      #number of simulation runs
n = 300         #sample size
n.train = 200   #n.test = n - n.train

#dynamic prediction information
obstime = seq(0,10,0.5)
Tstart = c(1,2,3,4) # landmark time for prediction
deltaT = c(1,2) # prediction windows

row.names = cbind(rep(Tstart, each=length(deltaT)), rep(deltaT, length(Tstart)))

models = c("RSF", "Cox")

listofTables = vector(mode="list", length=2)

i.model=1
for(model in models){

  #initialize empty matrix to store AUC/BS results
  auctrue.m = matrix(NA, nrow=nrow(row.names), ncol=n.sim)
  auc.m = matrix(NA, nrow=nrow(row.names), ncol=n.sim)
  BS.m = matrix(NA, nrow=nrow(row.names), ncol=n.sim)
  MSE.m = matrix(NA, nrow=nrow(row.names), ncol=n.sim)
  for(i.run in 1:n.sim){
    load(paste0(path, method, "_", model, i.run, ".rdata"))

    train.surv = surv[which(surv$id %in% train.id),]

    #estimate km curve for BS calculation
    km = survfit(Surv(time, event)~1, data=train.surv)
    survest = stepfun(km$time, c(1, km$surv))

    ith=0
    for(t in Tstart){
      for(dt in deltaT){
```

```

ith = ith + 1
tp = t + dt

test.surv = surv[surv$id%in%DP.id[[ith]], ]
N_vali = nrow(test.surv)

#TRUE AUC
roc = tdROC( X = 1-trueProb[[ith]], Y = timeEvent[[ith]]$time,
             delta = timeEvent[[ith]]$event,
             tau = tp, span = 0.05,
             nboot = 0, alpha = 0.05,
             n.grid = 1000, cut.off = 0.5)

auctrue.m[ith, i.run] = roc$AUC$value

#AUC
roc = tdROC( X = 1-DP.prob[[ith]], Y = timeEvent[[ith]]$time,
             delta = timeEvent[[ith]]$event,
             tau = tp, span = 0.05,
             nboot = 0, alpha = 0.05,
             n.grid = 1000, cut.off = 0.5)

auc.m[ith, i.run] = roc$AUC$value

#BRIER SCORE
D = rep(0, N_vali)
D[test.surv$time<=tp&test.surv$event==1] = 1
pi = 1-DP.prob[[ith]]

km_pts = survest(test.surv$time)/survest(t)
W2 <- D/km_pts
W1 <- as.numeric(test.surv$time>tp)/(survest(tp)/survest(t))
W <- W1 + W2

BS_pts <- W * (D - pi)^2
BS.m[ith, i.run] = sum(na.omit(BS_pts)) / N_vali
}
}
}

table = cbind(row.names, apply(auctrue.m, 1, mean, na.rm=T),
              apply(auc.m, 1, mean, na.rm=T), apply(BS.m, 1, mean, na.rm=T),
              apply(MSE.m, 1, mean, na.rm=T))

colnames(table) = c("t", "dt", "True.AUC", "AUC", "BS", "MSE")

```

```

    print(model)
    print(table)
    listOfTables[[i.model]] = table
    i.model = i.model+1
}

table = cbind(listofTables[[1]][,1:5], listOfTables[[2]][,4:5])
print(table)
save(table, file = paste0("output/output_", method, "_", scenario, ".rdata"))

```

### 3.4 Data simulation and other support functions

```

# simulation data for multivariate joint model linear (opt=["none","interaction"])
sim_mjm_linear = function(I, obstime = 1:10, miss = FALSE, miss.rate = 0.1, opt = "none"){

  # I : number of subjects
  # J : number of visits
  # obstime: observation times
  # miss: whether introduce missing (missing complete at random) in longitudinal data.
  ##Different from drop-out
  # miss.rate: missing rate.

  J = length(obstime)
  N = I*J

  ##### longitudinal submodel #####
  beta0 = c(1.5,2,0.5)
  beta1 = c(2,-1,1)
  betat = c(1.5, -1, 0.6)
  b.var = c(1,1.5,2)
  e.var = c(1,1,1)
  rho = c(-0.2,0.1,-0.3)
  b.Sigma = diag(b.var)
  b.Sigma[1,2] = b.Sigma[2,1] = sqrt(b.var[1]*b.var[2])*rho[1]
  b.Sigma[1,3] = b.Sigma[3,1] = sqrt(b.var[1]*b.var[3])*rho[2]
  b.Sigma[2,3] = b.Sigma[3,2] = sqrt(b.var[2]*b.var[3])*rho[3]

  # sample covariate
  X = rep(rnorm(I, 3, 1), each=J)
  # sample random effect
  ranef = mvrnorm(I, c(0,0,0), b.Sigma)
  id = rep(1:I, each=J)
  ranef = ranef[id,]
  # construct longitudinal submodel
  eta.long = matrix(0, nrow=N, ncol=3)
  for(i in 1:3)

```

```

eta.long[,i] = beta0[i] + beta1[i]*X + ranef[,i]

##### survival submodel #####
#interaction
if(opt=="interaction"){
  gamma = c(-4,-2,4)
  alpha = c(0.2, -0.2, 0.4)
  x1 = rbinom(I, size = 1, prob=.5)
  x2 = rnorm(I)
  x3 = x1*x2
  W = cbind(x1,x2,x3)
  eta.surv = W%*%gamma + c(alpha%*%t(eta.long[!duplicated(id),]))
}

else{
  gamma = c(-4,-2)
  alpha = c(0.2, -0.2, 0.4)
  x1 = rbinom(I, size = 1, prob=.5)
  x2 = rnorm(I)
  W = cbind(x1,x2)
  eta.surv = W%*%gamma + c(alpha%*%t(eta.long[!duplicated(id),]))
}

##### simulate survival time #####
scale = exp(-7)
S = runif(I)
Ti = rep(NA, I)
alpha.beta = alpha%*%betat
f = function(tau){
  h = function(t) {
    scale *exp(eta.surv[i] + c(alpha.beta)*t)
  }
  S[i] - exp(-stats::integrate(h, 0, tau)$value)
}
f = Vectorize(f)

for(i in 1:I){
  Ti[i] = uniroot(f, c(0, 100))$root
}

##### simulate true survival probability #####
pre.surtime = function(tau){
  h = function(t) {
    scale *exp(eta.surv[i] + c(alpha.beta)*t)
  }

  exp(-stats::integrate(h, 0, tau)$value)
}

```

```

}

true.prob = matrix(NA, nrow=I, ncol=length(obstime[-1]))
for(i in 1:I){
  ith = 0
  for(tau in obstime[-1]){
    ith = ith + 1
    true.prob[i, ith] = pre.surtime(tau)
  }
}

colnames(true.prob) = as.character(obstime[-1])

#-----
# simulate censor time
C = runif(I, min=obstime[3], max=obstime[5]+20)
time <- pmin(Ti, C) #observed time is min of censored and true
event <- ifelse(time==Ti, 1, 0) #0: censored ; 1: event;

# prepare data
visit = rep(1:J, I)
obstime = rep(obstime, I)
erro = mvrnorm(N, c(0,0,0), diag(e.var))
Y = matrix(0, nrow=N, ncol=3)
for(i in 1:3)
  Y[,i] = eta.long[,i] + betat[i]*obstime + erro[,i]

long.all = data.frame(id=id, visit=visit, time =
  rep(time, each=J), event = rep(event, each=J),
  Y1=Y[,1], Y2=Y[,2], Y3=Y[,3], obstime=obstime,
  X=X, ranef=ranef, W = W[rep(1:I, each=J)], erro=I(erro))

long = long.all

# introduce missing complete at random
if(miss){
  miss.index = sample(which(long$obstime>obstime[2]), miss.rate*N)
  long = long[!c(1:N)%in%miss.index, ]
}

surv = data.frame(id = c(1:I), time=time, event=event, W = W, true.prob=I(true.prob))

# remove observations after event or censoring
long = long[long$obstime<long$time, ]

return(list(long=long, surv=surv, long.all=long.all))
}

```

```

# univariate FPCA via principal analysis by conditional estimation(PACE)
uPACE = function(testData, domain, predData=NULL, nbasis = 10, pve = 0.9, npc = NULL){

  tmp = funData(domain, testData)
  if(is.null(predData)){
    tmp2 = NULL
  } else {
    tmp2 = funData(domain, predData)
  }

  res = PACE(tmp, tmp2, pve=pve, npc= npc, nbasis=nbasis)
  return(res)
}

# multivariate FPCA based on results from uPACE
mFPCA = function(Xi, phi, p, L, I=I){

  # eigenanalysis on matrix M
  M = t(Xi)%*%Xi/(I-1)
  eigen.M = eigen(M)
  values = eigen.M$values
  pve = cumsum(values)/sum(values)
  Cms = eigen.M$vectors
  index = unlist(lapply(1:length(L), function(x) rep(x, L[x])))

  # MFPCA score
  rho = mfPCA.score(Xi, Cms)

  # MFPCA eigenfunction
  psis = NULL
  for(j in 1:p){
    psi = NULL
    for(m in 1:dim(Cms)[2]){
      psi = cbind(psi, phi[[j]]%*%Cms[which(index==j),m])
    }
    psis[[j]] = psi
  }

  out = list(eigenvalue = values, Cms = Cms, pve = pve, index=index, rho = rho, psis=psis)

  return(out)
}

```



```

# mfpc score calculation
mfpc.score = function(predXi, Cms){
  rho = matrix(NA, nrow = nrow(predXi), ncol=dim(Cms)[2])
  for(i in 1:nrow(predXi)){
    for(m in 1:dim(Cms)[2]){
      rho[i,m] = predXi[i,]%*%Cms[,m]
    }
  }
  return(rho)
}

# mfpc trajectories prediction
mfpc.pred = function(score, meanf, psi, n.rho=NULL){
  p = length(psi)
  n = nrow(score)

  if(is.null(n.rho)){
    n.rho = ncol(score)
  }

  pred = array(NA, c(n, length(meanf[[1]]), p))
  for(m in 1:p){
    pred[, ,m] = matrix(meanf[[m]], nrow=n,
      ncol = length(meanf[[m]]), byrow = T ) + score[,1:n.rho]%*%t(psi[[m]][, 1:n.rho])
  }

  out = pred
  return(out)
}

#risk predict using predictSurvProb instead of survfit to handle RSF. (REQUIRES PEC)
cond.prob.pec = function(model, newdata, Tstart, Tpred){
  risk.Tstart = as.numeric(predictSurvProb(model, newdata=newdata, times=Tstart))
  risk.Tpred = as.numeric(predictSurvProb(model, newdata=newdata, times=Tpred))
  return(risk.Tpred/risk.Tstart)
}

```
